# Supplementary material for: n-Type doping of BiVO4 with different F-doped concentrations for improving the electronic character of BiVO4 as a photoanode nanomaterial for solar water splitting: a first-principles study
Source: Royal Society of Chemistry journal article supplement (doi:10.1039/d3cp02919k), 2023-01-01
Supplement: d3cp02919k1.pdf [file d3cp02919k1.pdf]

## Supporting Information

# *n*-type Doping of BiVO<sub>4</sub> by Different F-doped Concentrations for Improving the Electronic Character of BiVO<sub>4</sub> as Photoanode Nanomaterial for Solar Water Splitting: A First-principles Study

*Yongze Zhao, Xinxia Li, Xinyuan Tang, Xuefeng Liang, Yan He, Huifang Li\**

College of Electromechanical Engineering, Shandong Engineering Laboratory for Preparation and Application of High-performance Carbon-Materials, Qingdao University of Science & Technology, Qingdao, Shandong 266061, China

\*Email: huifang0801@gmail.com

### **Table of contents**

Figure S1. Energy cutoff test results.

Figure S2. Density of states plots of O-BiVO<sub>4</sub> and F-doped BiVO<sub>4</sub> at the HSE06 level.

Figure S3. DOS and BS results for BiVO<sub>4</sub> obtained at the PBE level.

Figure S4. DOS and BS results for F-doped BiVO<sub>4</sub> obtained at the PBE level.

Figure S5. Energy level alignment of the pristine and F-doped BiVO<sub>4</sub>.

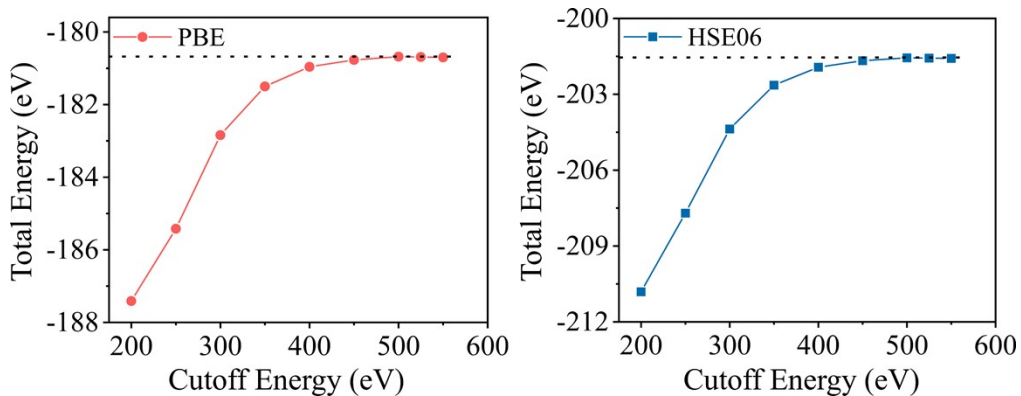

**Figure S1.** Convergence test results with respect to kinetic-energy cutoff.

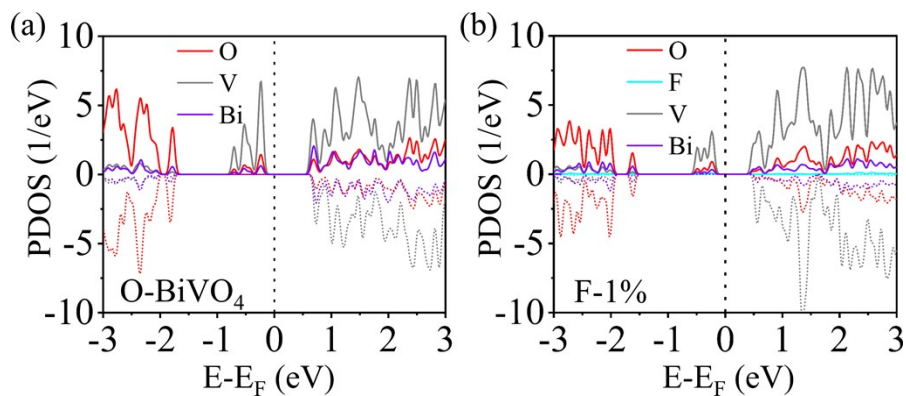

**Figure S2.** Projected density of states of (a) O-BiVO<sub>4</sub> (one O atom vacancy) and (b) F-doped BiVO<sub>4</sub> (replacing one O atom with F atom) obtained at the HSE06 level.

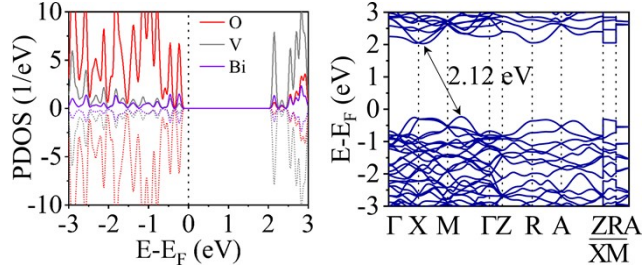

**Figure S3.** projected density of states and electronic band structure of pristine  $\text{BiVO}_4$  crystal calculated by the PBE function.

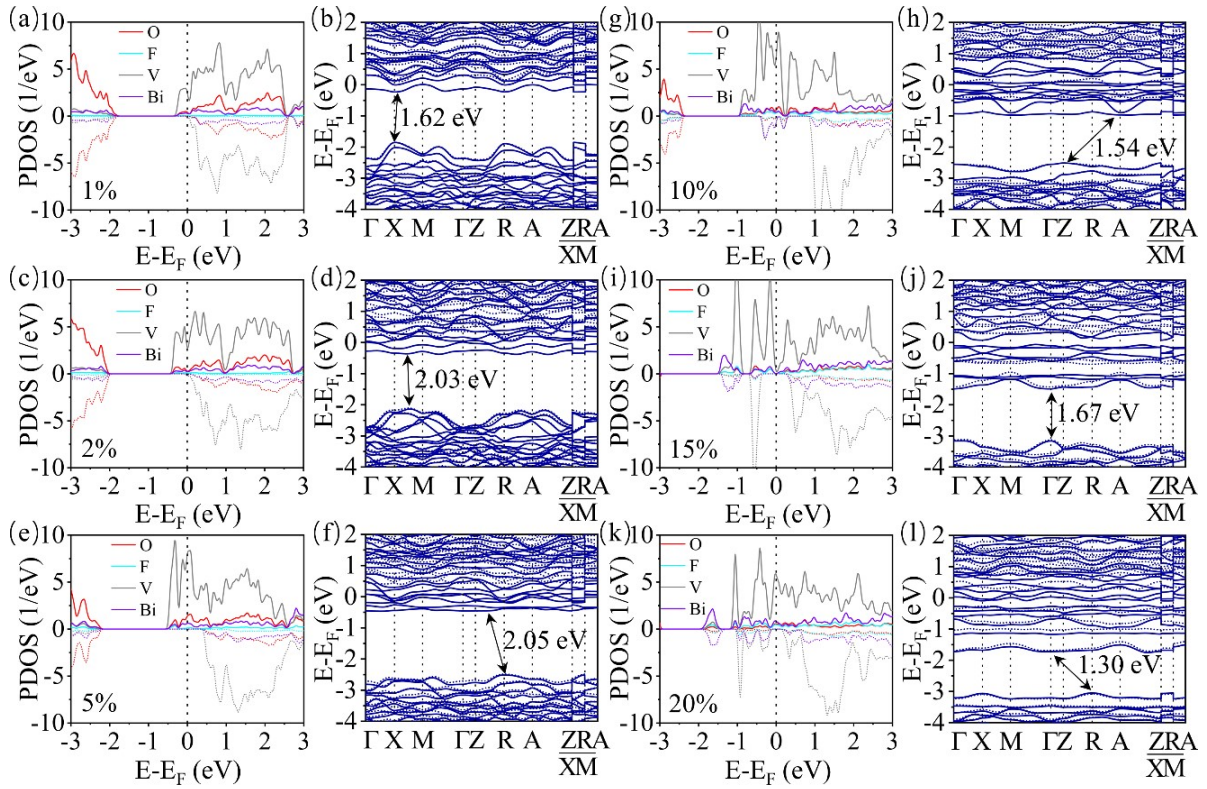

**Figure S4.** Projected density of states and electronic band structures of F-doped  $\text{BiVO}_4$  crystal with different doping mass concentrations calculated by the PBE function. The solid and dash lines represent projections to the spin-up, spin-down states of the F-doped  $\text{BiVO}_4$ , respectively, and the VBM and CBM are indicated by the black arrows.

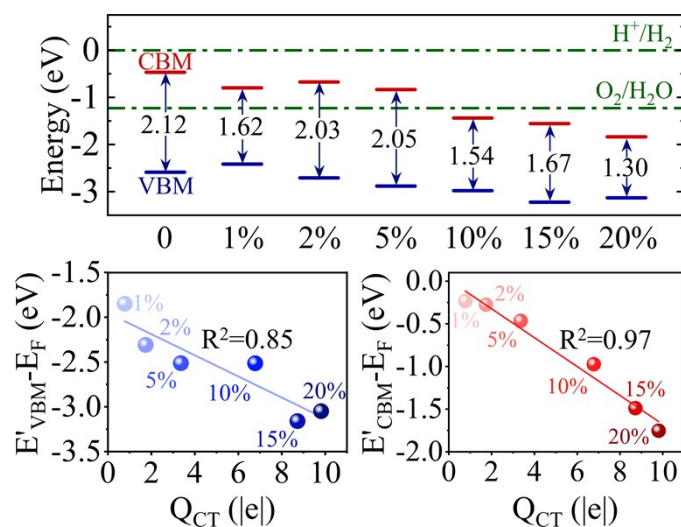

**Figure S5.** Top panel: calculated band gaps and band edge positions of pristine and F-doped  $BiVO_4$  at the PBE level, which are given relative to the standard redox potentials for water splitting. Bottom panels: linear relationship between the frontier energy level shift (relative to the Fermi level) and the total charge transfer amounts from doping F atoms to other atoms involved in F-doped  $BiVO_4$  (bottom panel).
